# Supplementary material
Source: bioRxiv or medRxiv preprint supplement (https://www.biorxiv.org/highwire/filestream/76328/field_highwire_adjunct_files/2/249227-3.pdf)

Figure S2

A

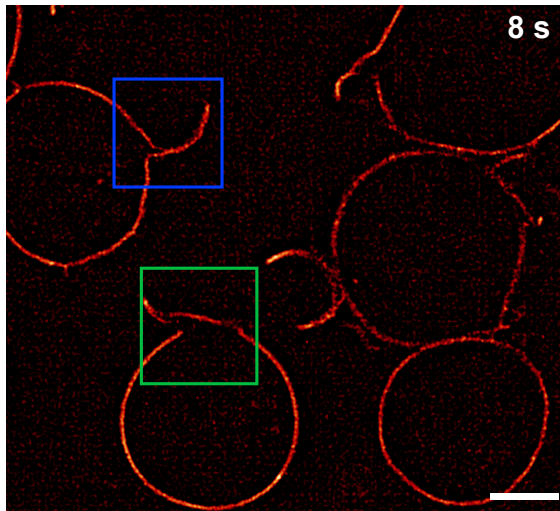

B

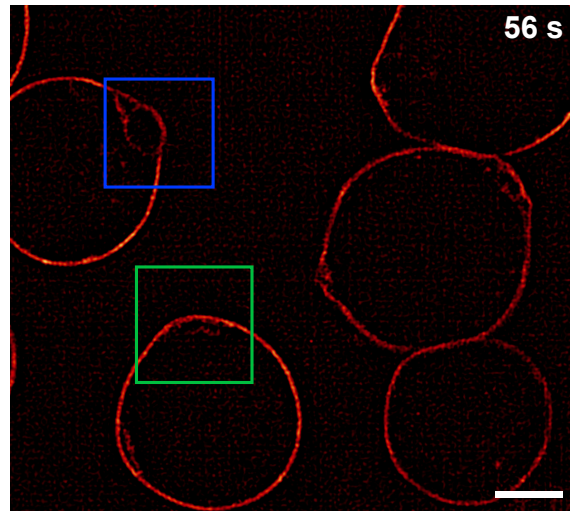

C

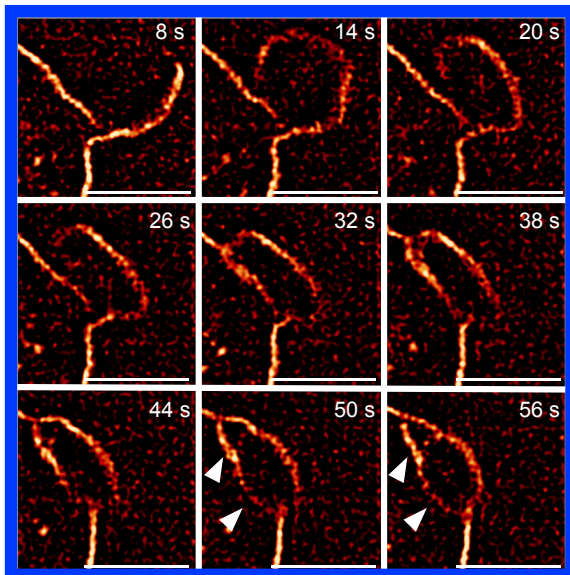

D

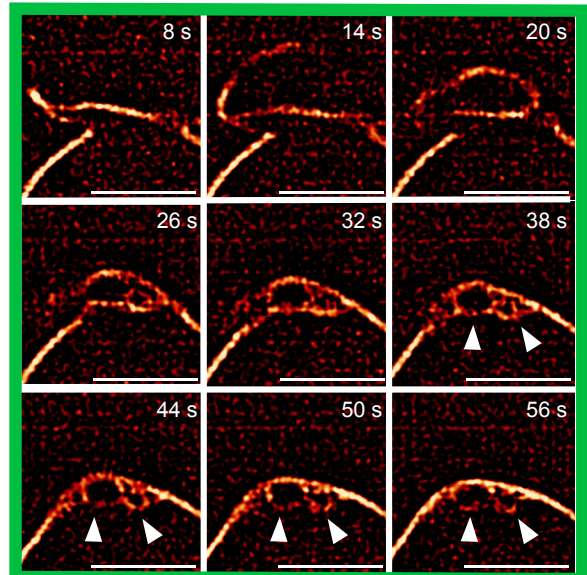

Supplement: Supplementary file [file 249227-3.pdf]
